# Supplementary material for: Amnion epithelial cells are an effective source of factor H and prevent kidney complement deposition in factor H-deficient mice
Source: PubMed Central journal article supplement (PMC8194190; doi:10.1186/s13287-021-02386-7), 2021-06-10
Supplement: 13287_2021_2386_MOESM2_ESM.pdf [file 13287_2021_2386_MOESM2_ESM.pdf]

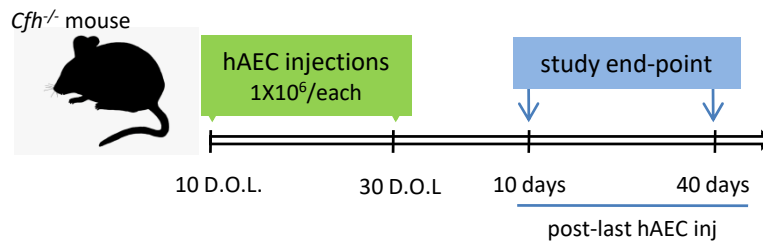

**Supplementary Figure S1. Schematic overview of hAEC injections in *Cfh*<sup>-/-</sup> mice.** hAEC or PBS were injected percutaneously in the liver of *Cfh*<sup>-/-</sup> mice at 10 days of life (D.O.L.) and via portal vein at 40 D.O.L. Mice were euthanized either 10 days or 40 days after the last hAEC injection (n=3-5 mice per each group).
