# Supplementary material for: Amnion epithelial cells are an effective source of factor H and prevent kidney complement deposition in factor H-deficient mice
Source: PubMed Central journal article supplement (PMC8194190; doi:10.1186/s13287-021-02386-7), 2021-06-10
Supplement: 13287_2021_2386_MOESM4_ESM.pdf [file 13287_2021_2386_MOESM4_ESM.pdf]

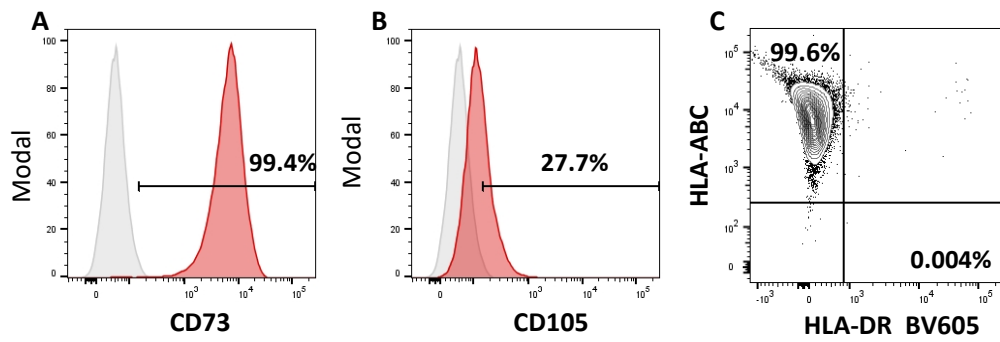

**Supplementary Figure S3.** Representative FACS histograms for CD73 (A) and CD105 (B) expression and dot plots for HLA-ABC and HLA-DR expression (C) of hAEC.
